# Supplementary material for: Mapping the Global Chromatin Connectivity Network for Sox2 Function in Neural Stem Cell Maintenance
Source: PubMed Central journal article supplement (PMC6506828; doi:10.1016/j.stem.2019.02.004), 2019-03-07
Supplement: mmc7.pdf [file mmc7.pdf]

## Methods S1, PCR primers for anchor amplification

(related to STAR Methods, Zebrafish transgenesis)

| Gene associated with proximal anchor | Cloned anchor | Forward primer (5'→3')          | Reverse primer (5'→3')       |
|--------------------------------------|---------------|---------------------------------|------------------------------|
| <b>Nkx2.1</b>                        | DA504         | TCCCGTTCCTAGTCTTTGATACTT        | CGAGCAACAGGAGAGGAATAATT<br>T |
| <b>Sp8</b>                           | PA545         | GACATCCAGACCTCTGTTTTCC          | TCTACCAGAGGTGGGATTCAAG       |
| <b>Sp8</b>                           | DA545         | GGGAAGAGTTCCTAGCCATT            | GTGGGAGCTCAATTCATCTAA        |
| <b>Coup-TFI</b>                      | DA246<br>7    | GCTCCAGCGTCTACTGAGAAAT          | AGCAGAATCCCTGAGACTTCAC       |
| <b>Coup-TFI</b>                      | DA231         | CCAGTGAAACACCTACTCACCA          | AAGTTGGCATTTTTAGGACTCG       |
| <b>Ntng1</b>                         | DA141<br>4    | GTAGAGGCGCGGAACCATAG            | GGGGTAAAAGGAAAGGGCAAA        |
| <b>Irx1</b>                          | DA597         | CAGCAAAGCATTGTAAGTGTGA          | TGGGGCTTTAACACAAGCAT         |
| <b>Socs3</b>                         | DA463         | GCTCACACTGACCCATAGGTTT          | TTGCCTCTCAGAGTGAACCA         |
| <b>Chd7</b>                          | DA143<br>9    | AGGCAAGCTCACCAGCTCT             | GATTTCAAAGGCAGCCACAT         |
| <b>Sox3</b>                          | DA273<br>3    | GGAGGCACATGAAAGCAATAA           | GGTAAGGTTAAAATGGCTTTTG       |
| <b>Sox3</b>                          | DA270<br>2    | ACTGTCCATTTAGTTTTTCATAAATC<br>A | GTGGGCAGGGATACCTTAGTCT       |
| <b>Sox4</b>                          | DA245<br>8    | GTCCTTCAGCAAGCTCTAAACA          | AATGGTGGTGAAATCTGCAAGT       |
| <b>Cxcr4</b>                         | DA62          | GGACCCCTCAGTGAATATTAAGG         | TTTGCACTGTGGTACACATTTT       |
| <b>Zfp355</b>                        | DA130<br>3    | CTAGCACTCAACCCTGAGATT           | GACTTCAGAATGGAGCCAGAAC       |
| <b>Zfp355</b>                        | PA1303        | AAGTAGTTCGCGTTTCGAG             | TTTGAGGCTTTCACTCTGCTG        |
| <b>Fos</b>                           | DA852         | CCAGGCCAGTCTTTTCACAC            | TCGAGGCTAGTTTGGGTTGT         |
| <b>Fos</b>                           | DA854         | TAATCTTCTGACTCCCCGGC            | GAGCTGGTGAGTGCAGTCTA         |
